# Supplementary material for: Prediction of Graft Survival Post-liver Transplantation by L-GrAFT Risk Score Model, EASE Score, MEAF Scoring, and EAD
Source: PubMed Central journal article supplement (PMC8641658; doi:10.3389/fsurg.2021.753056), 2021-11-19
Supplement: Table_1.pdf [file Table_1.pdf]

**sTable1 Characteristic of 677 orthotopic liver transplantation patients**

| Variables                           | Frequency (%) or Median (IQR) |
|-------------------------------------|-------------------------------|
| Recipient Demographics              |                               |
| Age (years)                         | 51 (43, 59)                   |
| Gender                              |                               |
| Male                                | 88.8                          |
| Female                              | 11.2                          |
| Diagnosis                           |                               |
| HCC                                 | 53.3                          |
| Hepatitis B virus-related cirrhosis | 22.0                          |
| ACLF                                | 9.7                           |
| Alcoholic cirrhosis                 | 4.1                           |
| Other                               | 10.8                          |
| BMI (kg/m <sup>2</sup> )            | 23.1 (20.8, 24.8)             |
| Height (cm)                         | 169.0 (165.0, 172.0)          |
| Weight (kg)                         | 65.0 (57.5, 71.0)             |
| Comorbidity                         |                               |
| Diabetes                            | 14.8                          |
| Hypertension                        | 13.6                          |
| Cardiovascular system diseases      | 3.5                           |
| Pretransplantation                  |                               |
| Laboratory MELD score               | 12 (7, 22)                    |
| CREA (μmol/L)                       | 71 (59, 89)                   |
| TBIL (μmol/L)                       | 43.4 (20.1, 229.0)            |
| INR                                 | 1.34 (1.12, 1.89)             |
| Laboratory MELD score (HCC)         | 8 (5, 13)                     |
| Laboratory MELD score (Others)      | 18 (11, 28)                   |
| Child-Pugh score                    | 8 (6, 10)                     |
| Infection                           | 10.5                          |
| Renal replacement therapy           | 1.2                           |
| Mechanical ventilation              | 1.2                           |
| Donor                               |                               |
| Age (years), median                 | 38 (24, 47)                   |
| Gender                              |                               |
| Male                                | 74.9                          |
| Female                              | 25.1                          |
| BMI (kg/m <sup>2</sup> )            | 22.1 (20.3, 23.9)             |
| Height (cm)                         | 168.0 (160.0, 170.0)          |
| Weight (kg)                         | 60.0 (55.0, 68.0)             |
| Cause of death                      |                               |
| Trauma                              | 47.7                          |
| CVA                                 | 37.2                          |
| HIE                                 | 8.1                           |
| Others                              | 6.9                           |

---

| The Chinese Classification of Deceased Organ |                   |
|----------------------------------------------|-------------------|
| Donation                                     |                   |
| C-I (DBD)                                    | 79.3              |
| C-II (DCD)                                   | 16.2              |
| C-III (DBCD)                                 | 4.4               |
| Comorbidity                                  |                   |
| Hypertension                                 | 10.1              |
| Diabetes                                     | 9.3               |
| Cardiovascular system diseases               | 0.9               |
| DRI                                          | 1.66 (1.41, 2.06) |
| Peri-operation                               |                   |
| Anhepatic phase (min)                        | 54 (43, 65)       |
| WIT (min)*                                   | 5 (6, 10)         |
| CIT (min)                                    | 421 (334, 522)    |
| Total operation time                         | 450 (390, 525)    |
| Transfusion                                  |                   |
| RBC (unit)                                   | 5.0 (2.3, 8.0)    |
| Fresh frozen plasma (unit)                   | 7.5 (5.0, 10.6)   |
| Intraoperative hemorrhage (ml)               | 1500 (1000, 2800) |
| Post-operative                               |                   |
| Mechanical ventilation (hour)                | 17.5 (12.0, 43.0) |
| ICU stays (hour)                             | 40.0 (23.0, 87.6) |

---

Abbreviations: ACLF, acute-on-chronic liver failure; BMI, body mass index; CIT, cold ischemia time; CREA, creatinine; CVA, cerebrovascular accident; DBCD, donation after brain and cardiac death; DBD, donation after brain death; DCD, donation after cardiac death; DRI, donor risk index; HCC, hepatocellular carcinoma; HIE, hypoxic-ischemic encephalopathy; ICU, intensive care unit; INR, international normalized ratio; MELD, Model for End-Stage Liver Disease; TBIL, total bilirubin; WIT, warm ischemia time.

Note: Data for some variables were not available for some recipients or donors, so the results presented are based on available information only.

\*Only be calculated in DCD and DBCD cases.
